# Supplementary material
Source: PubMed Central journal article supplement (PMC2736439)
Supplement: 0907740106_0907740106SI.pdf [file 0907740106_0907740106SI.pdf]

# Supporting Information

Rich et al. 10.1073/pnas.0907740106

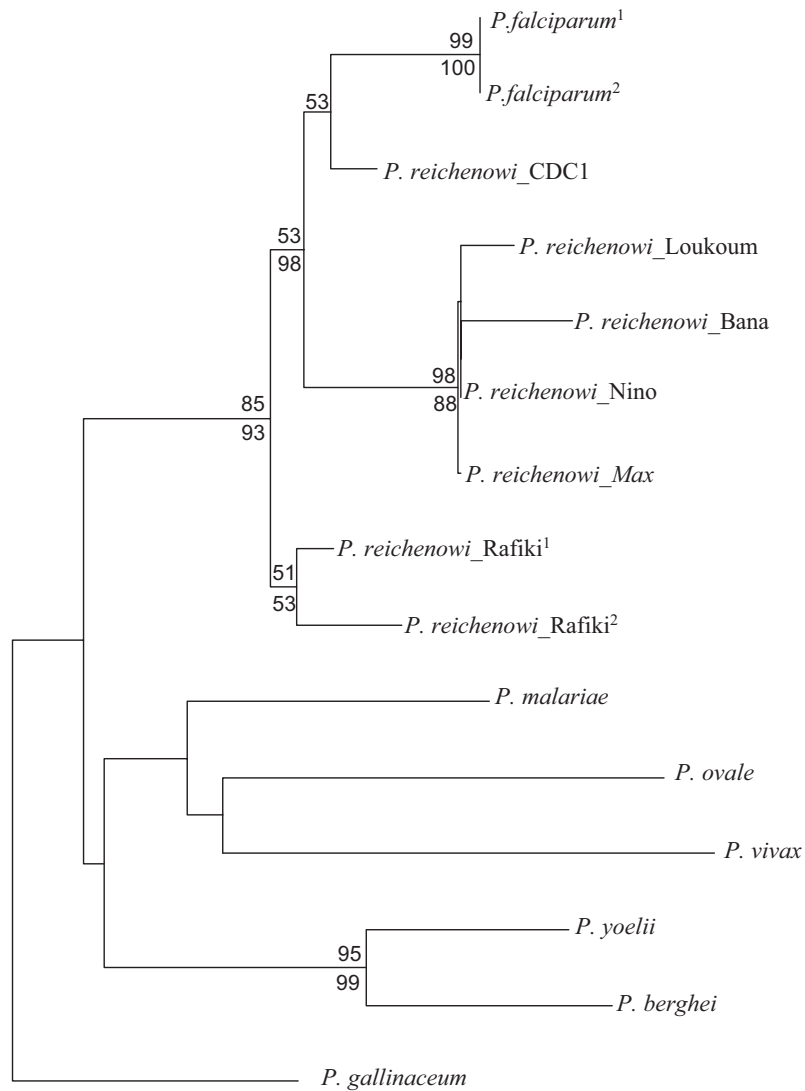

**Fig. S1.** Phylogeny based on the *clpC* gene of *P. falciparum*, *P. reichenowi*, three other human parasites (*P. malariae*, *P. ovale*, and *P. vivax*), as well as two rodent parasites (*P. yoelii* and *P. berghei*), and one bird parasite (*P. gallinaceum*).

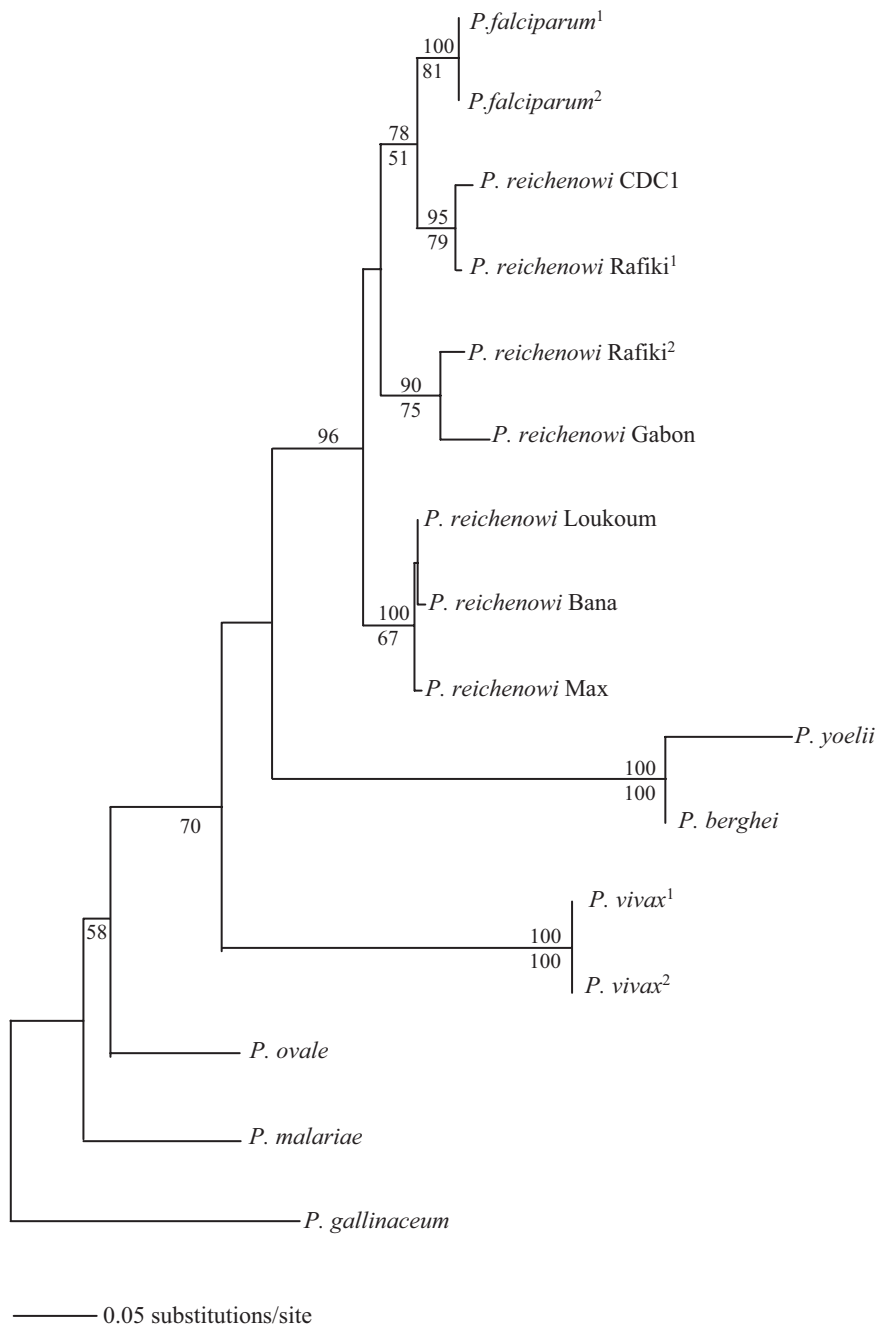

Fig. S2. *Plasmodium* phylogeny based on the 18S rRNA gene (see legend for Fig. S1).

Table S1. *cytB* accession numbers and key to taxa

| Taxon                                       | Accession no.                                                                                                                                                                                                                                                                                                                                                                                                                                                                                                                                                                                                                                                                                                                                                                                                                                                                                                                                                                             |
|---------------------------------------------|-------------------------------------------------------------------------------------------------------------------------------------------------------------------------------------------------------------------------------------------------------------------------------------------------------------------------------------------------------------------------------------------------------------------------------------------------------------------------------------------------------------------------------------------------------------------------------------------------------------------------------------------------------------------------------------------------------------------------------------------------------------------------------------------------------------------------------------------------------------------------------------------------------------------------------------------------------------------------------------------|
| <i>P. reich_Bana</i>                        | EU560453                                                                                                                                                                                                                                                                                                                                                                                                                                                                                                                                                                                                                                                                                                                                                                                                                                                                                                                                                                                  |
| <i>P. reich_Gabon</i>                       | EU560466                                                                                                                                                                                                                                                                                                                                                                                                                                                                                                                                                                                                                                                                                                                                                                                                                                                                                                                                                                                  |
| <i>P. reich_Loukoum</i>                     | EU560459                                                                                                                                                                                                                                                                                                                                                                                                                                                                                                                                                                                                                                                                                                                                                                                                                                                                                                                                                                                  |
| <i>P. reich_Max</i>                         | EU560455                                                                                                                                                                                                                                                                                                                                                                                                                                                                                                                                                                                                                                                                                                                                                                                                                                                                                                                                                                                  |
| <i>P. reich_Nino</i>                        | EU560454                                                                                                                                                                                                                                                                                                                                                                                                                                                                                                                                                                                                                                                                                                                                                                                                                                                                                                                                                                                  |
| <i>P. reich_Rafiki1</i>                     | EU560456                                                                                                                                                                                                                                                                                                                                                                                                                                                                                                                                                                                                                                                                                                                                                                                                                                                                                                                                                                                  |
| <i>P. reich_Rafiki2</i>                     | EU560458                                                                                                                                                                                                                                                                                                                                                                                                                                                                                                                                                                                                                                                                                                                                                                                                                                                                                                                                                                                  |
| <i>Reich_Dibamba</i>                        | EU560457                                                                                                                                                                                                                                                                                                                                                                                                                                                                                                                                                                                                                                                                                                                                                                                                                                                                                                                                                                                  |
| <i>P. falciparum</i> <sup>1</sup> (n = 13)  | AJ298787, AJ298786, AJ298785, AJ298784, AJ298783, AJ298782, AJ298781, AJ298780, AJ298779, AJ298778, AJ298777, AJ298776, AJ298775,                                                                                                                                                                                                                                                                                                                                                                                                                                                                                                                                                                                                                                                                                                                                                                                                                                                         |
| <i>P. falciparum</i> <sup>2</sup> (n = 3)   | AF212048, AF212047, AF212046, AF155927                                                                                                                                                                                                                                                                                                                                                                                                                                                                                                                                                                                                                                                                                                                                                                                                                                                                                                                                                    |
| <i>P. falciparum</i> <sup>3</sup>           | AY588280                                                                                                                                                                                                                                                                                                                                                                                                                                                                                                                                                                                                                                                                                                                                                                                                                                                                                                                                                                                  |
| <i>P. falciparum</i> <sup>4</sup>           | AY588279                                                                                                                                                                                                                                                                                                                                                                                                                                                                                                                                                                                                                                                                                                                                                                                                                                                                                                                                                                                  |
| <i>P. falciparum</i> <sup>5</sup> (n = 4)   | DQ642845, AY282962, AY282961, AY282957                                                                                                                                                                                                                                                                                                                                                                                                                                                                                                                                                                                                                                                                                                                                                                                                                                                                                                                                                    |
| <i>P. falciparum</i> <sup>6</sup> (n = 2)   | AY282998, AY282929                                                                                                                                                                                                                                                                                                                                                                                                                                                                                                                                                                                                                                                                                                                                                                                                                                                                                                                                                                        |
| <i>P. falciparum</i> <sup>7</sup>           | AY282947                                                                                                                                                                                                                                                                                                                                                                                                                                                                                                                                                                                                                                                                                                                                                                                                                                                                                                                                                                                  |
| <i>P. falciparum</i> <sup>8</sup>           | AY282975                                                                                                                                                                                                                                                                                                                                                                                                                                                                                                                                                                                                                                                                                                                                                                                                                                                                                                                                                                                  |
| <i>P. falciparum</i> <sup>9</sup> (n = 2)   | AY283004, AY283003                                                                                                                                                                                                                                                                                                                                                                                                                                                                                                                                                                                                                                                                                                                                                                                                                                                                                                                                                                        |
| <i>P. falciparum</i> <sup>10</sup> (n = 96) | AY283019, AY283018, AY283017, AY283016, AY283015, AY283014, AY283013, AY283012, AY283011, AY283010, AY283009, AY283008, AY283007, AY283006, AY283005, AY283002, AY283001, AY283000, AY282999, AY282997, AY282996, AY282995, AY282994, AY282993, AY282992, AY282991, AY282990, AY282989, AY282988, AY282987, AY282986, AY282985, AY282984, AY282983, AY282982, AY282981, AY282980, AY282979, AY282978, AY282977, AY282976, AY282974, AY282973, AY282972, AY282971, AY282970, AY282969, AY282968, AY282967, AY282966, AY282965, AY282964, AY282963, AY282960, AY282959, AY282958, AY282956, AY282955, AY282954, AY282953, AY282952, AY282951, AY282950, AY282949, AY282948, AY282946, AY282945, AY282944, AY282943, AY282942, AY282941, AY282940, AY282939, AY282938, AY282937, AY282936, AY282935, AY282934, AY282933, AY282932, AY282931, AY282930, AY282928, AY282927, AY282926, AY282925, AY282924, M76611, M99416, AJ276847, AJ276846, AJ276845, AJ276844, AY910014, AY910013, Y910012 |
| <i>P. falciparum</i> <sup>11</sup> (n = 3)  | AF212049, AF155926, AF155925                                                                                                                                                                                                                                                                                                                                                                                                                                                                                                                                                                                                                                                                                                                                                                                                                                                                                                                                                              |
| <i>P. reich_CDC1</i>                        | AJ251941                                                                                                                                                                                                                                                                                                                                                                                                                                                                                                                                                                                                                                                                                                                                                                                                                                                                                                                                                                                  |
| <i>P. ovale</i> <sup>1</sup>                | AB182497                                                                                                                                                                                                                                                                                                                                                                                                                                                                                                                                                                                                                                                                                                                                                                                                                                                                                                                                                                                  |
| <i>P. ovale</i> <sup>2</sup>                | AB182496                                                                                                                                                                                                                                                                                                                                                                                                                                                                                                                                                                                                                                                                                                                                                                                                                                                                                                                                                                                  |
| <i>P. ovale</i> <sup>3</sup>                | AF069625                                                                                                                                                                                                                                                                                                                                                                                                                                                                                                                                                                                                                                                                                                                                                                                                                                                                                                                                                                                  |
| <i>P. malariae</i>                          | AF069624                                                                                                                                                                                                                                                                                                                                                                                                                                                                                                                                                                                                                                                                                                                                                                                                                                                                                                                                                                                  |
| <i>P. vivax</i> <sup>1</sup>                | AF069619                                                                                                                                                                                                                                                                                                                                                                                                                                                                                                                                                                                                                                                                                                                                                                                                                                                                                                                                                                                  |
| <i>P. vivax</i> <sup>2</sup>                | Y17721                                                                                                                                                                                                                                                                                                                                                                                                                                                                                                                                                                                                                                                                                                                                                                                                                                                                                                                                                                                    |
| <i>P. vivax</i> <sup>3</sup> (n = 2)        | AY791683, AY791644                                                                                                                                                                                                                                                                                                                                                                                                                                                                                                                                                                                                                                                                                                                                                                                                                                                                                                                                                                        |
| <i>P. vivax</i> <sup>4</sup>                | AY791525                                                                                                                                                                                                                                                                                                                                                                                                                                                                                                                                                                                                                                                                                                                                                                                                                                                                                                                                                                                  |
| <i>P. vivax</i> <sup>5</sup>                | AY791614                                                                                                                                                                                                                                                                                                                                                                                                                                                                                                                                                                                                                                                                                                                                                                                                                                                                                                                                                                                  |
| <i>P. vivax</i> <sup>6</sup>                | AY791678                                                                                                                                                                                                                                                                                                                                                                                                                                                                                                                                                                                                                                                                                                                                                                                                                                                                                                                                                                                  |

*P. vivax*<sup>7</sup> (n = 279)

AF055587, AY722798, AY598140, AY598139, AY598136, AY598133, AY598132, AY598127, AY598126, AY598125, AY598124, AY598123, AY598122, AY598121, AY598120, AY598118, AY598117, AY598116, AY598115, AY598114, AY598113, AY598112, AY598111, AY598110, AY598109, AY598108, AY598107, AY598106, AY598105, AY598104, AY598103, AY598102, AY598101, AY598100, AY598099, AY598098, AY598097, AY598096, AY598095, AY598094, AY598093, AY598092, AY598091, AY598090, AY598089, AY598088, AY598087, AY598086, AY598085, AY598084, AY598083, AY598082, AY598081, AY598080, AY598079, AY598078, AY598077, AY598076, AY598075, AY598074, AY598073, AY598072, AY598071, AY598070, AY598069, AY598068, AY598066, AY598065, AY598064, AY598063, AY598062, AY598061, AY598060, AY598059, AY598058, AY598057, AY598056, AY598055, AY598054, AY598053, AY598052, AY598051, AY598050, AY598049, AY598048, AY598047, AY598046, AY598045, AY598044, AY598043, AY598042, AY598041, AY598040, AY598038, AY598037, AY598036, AY598035, AY800110, AY791692, AY791691, AY791690, AY791689, AY791688, AY791686, AY791684, AY791682, AY791681, AY791680, AY791679, AY791677, AY791676, AY791674, AY791673, AY791672, AY791671, AY791670, AY791669, AY791668, AY791667, AY791666, AY791665, AY791664, AY791663, AY791662, AY791661, AY791660, AY791659, AY791658, AY791657, AY791656, AY791655, AY791654, AY791653, AY791652, AY791651, AY791650, AY791648, AY791647, AY791646, AY791645, AY791643, AY791642, AY791641, AY791640, AY791639, AY791638, AY791637, AY791636, AY791635, AY791634, AY791633, AY791632, AY791631, AY791630, AY791629, AY791628, AY791627, AY791626, AY791625, AY791624, AY791623, AY791622, AY791621, AY791620, AY791619, AY791618, AY791617, AY791616, AY791615, AY791613, AY791611, AY791610, AY791609, AY791608, AY791607, AY791606, AY791605, AY791603, AY791601, AY791600, AY791599, AY791594, AY791592, AY791591, AY791590, AY791584, AY791583, AY791582, AY791581, AY791580, AY791579, AY791578, AY791577, AY791576, AY791575, AY791574, AY791573, AY791572, AY791571, AY791570, AY791569, AY791568, AY791567, AY791566, AY791565, AY791564, AY791563, AY791562, AY791561, AY791560, AY791559, AY791558, AY791557, AY791556, AY791555, AY791553, AY791552, AY791551, AY791550, AY791549, AY791548, AY791547, AY791546, AY791545, AY791544, AY791543, AY791542, AY791541, AY791540, AY791539, AY791538, AY791537, AY791536, AY791535, AY791534, AY791533, AY791532, AY791531, AY791530, AY791529, AY791528, AY791527, AY791526, AY791524, AY791523, AY791522, AY791521, AY791520, AY791519, AY791518, AY791517, AY598131, AY791554, AY598138, AY598137, AY598135, AY598134, AY598130, AY598129, AY598128, AY598119, AY598067, AY598039, AY791687, AY791675, AY791649, AY791604, AY791602, AY791598, AY791597, AY791596, AY791595, AY791593, AY791589, AY791588, AY791587, AY791586, AY791585

*P. vivax*\_8 (n = 2)

AY791612, AY791685

*P. yoelii* (n = 3)

XM724136, XM721750, XM721744

*P. berghei*\_1

EF011166

*P. berghei*\_2 (n = 2)

AF014115, AF146076

*P. gallinaceum*

AB250690

**Table S2. *clpC* accession numbers and key to taxa**

| Species                                  | Accession no. | Strain              |
|------------------------------------------|---------------|---------------------|
| <i>P. falciparum</i> <sup>1</sup>        | DQ642846      | HB3                 |
| <i>P. falciparum</i> <sup>2</sup>        | X95276        | C10                 |
| <i>P. reichenowi</i> CDC1                | xxxxxx        | CDC1                |
| <i>P. reichenowi</i> Loukoum             | EU560462      | Loukoum             |
| <i>P. reichenowi</i> Rafiki <sup>1</sup> | EU560460      | Rafiki <sup>1</sup> |
| <i>P. reichenowi</i> Rafiki <sup>2</sup> | EU560461      | Rafiki <sup>2</sup> |
| <i>P. reichenowi</i> Bana                | EU560463      | Bana                |
| <i>P. reichenowi</i> Max                 | EU560465      | Max                 |
| <i>P. reichenowi</i> Nino                | EU560464      | Nino                |
| <i>P. vivax</i>                          | AF348344      | Na                  |
| <i>P. malariae</i>                       | AF348342      | Na                  |
| <i>P. ovale</i>                          | AY634623      | Na                  |
| <i>P. berghei</i>                        | AF348337      | Na                  |
| <i>P. yoelii</i>                         | AY634624      | yoelii              |
| <i>P. gallinaceum</i>                    | AF348340      | Na                  |

xxx, no accession no. available.

**Table S3. 18S rRNA accession numbers and key to taxa**

| Species                             | Accession no. | Strain         |
|-------------------------------------|---------------|----------------|
| <i>P. falciparum</i> <sup>1</sup>   | M19172        |                |
| <i>P. falciparum</i> <sup>2</sup>   | AL929354      | 3D7            |
| <i>P. reich</i> CDC1                | Z25819        | CDC1           |
| <i>P. reich</i> Rafiki <sup>1</sup> | EU560447      | Rafiki*        |
| <i>P. reich</i> Rafiki <sup>2</sup> | EU560448      | Rafiki*        |
| <i>P. reich</i> Loukoum             | EU560449      | Loukoum        |
| <i>P. reich</i> Bana                | EU560450      | Bana           |
| <i>P. reich</i> Max                 | EU560451      | Max            |
| <i>P. reich</i> Dibamba             | EU560452      | Dibamba        |
| <i>P. reich</i> Gabon               | EU560467      | Gabon          |
| <i>P. vivax</i> EIS                 | U07367        | El Salvador    |
| <i>P. vivax</i> PVK                 | U93233        | PVK1294 (Thai) |
| <i>P. malariae</i>                  | AF488000      | Myanmar        |
| <i>P. ovale</i>                     | AB182490      | M3 (Myanmar)   |
| <i>P. berghei</i>                   | M14599        |                |
| <i>P. yoeli</i>                     | AF180727      |                |
| <i>P. gallinaceum</i>               | M61723        |                |

\*Multiple strains from same individual which may or may not correspond to strain designations for other gene regions.
